# Supplementary material for: Dpep Inhibits Cancer Cell Growth and Survival via Shared and Context-Dependent Transcriptome Perturbations
Source: MDPI journal article supplement (doi:10.3390/cancers15225318), 2023-11-07
Supplement: s1 [file s1]

|            |                                      | HCT116 | MDA-MB-231 | T98  | A375 | A549 | MCF7 |
|------------|--------------------------------------|--------|------------|------|------|------|------|
| HCT116     |                                      |        |            |      |      |      |      |
|            | % NON-OVERLAP                        | 45     |            |      |      |      |      |
|            | % OVERLAP                            |        | 26.8       | 11.6 | 2    | 39.1 | 5.60 |
|            | % OVERLAP<br>NORMALIZED/1000<br>DEGS |        | 15.1       | 15.5 | 8.7  | 10   | 13.8 |
|            |                                      |        |            |      |      |      |      |
|            |                                      | HCT116 | MDA-MB-231 | T98  | A375 | A549 | MCF7 |
| MDA-MB-231 |                                      |        |            |      |      |      |      |
|            | % NON-OVERLAP                        |        | 47.2       |      |      |      |      |
|            | % OVERLAP                            | 4.5    |            | 9.4  | 2.3  | 44.9 | 3.7  |
|            | % OVERLAP<br>NORMALIZED/1000<br>DEGS | 14.9   |            | 12.6 | 10   | 11.5 | 9.3  |
|            |                                      |        |            |      |      |      |      |
|            |                                      | HCT116 | MDA-MB-231 | T98  | A375 | A549 | MCF7 |
| T98G       |                                      |        |            |      |      |      |      |
|            | % NON-OVERLAP                        |        |            | 48.4 |      |      |      |
|            | % OVERLAP                            | 4.7    | 22.3       |      | 2.9  | 34   | 7.1  |
|            | % OVERLAP<br>NORMALIZED/1000<br>DEGS | 15.6   | 12.6       |      | 12.7 | 8.7  | 17.8 |
|            |                                      |        |            |      |      |      |      |
|            |                                      | HCT116 | MDA-MB-231 | T98  | A375 | A549 | MCF7 |
| A375       |                                      |        |            |      |      |      |      |
|            | % NON-OVERLAP                        |        |            |      | 54.1 |      |      |
|            | % OVERLAP                            | 2.6    | 17.9       | 9.6  |      | 31.4 | 12.7 |
|            | % OVERLAP<br>NORMALIZED/1000<br>DEGS | 8.6    | 10.1       | 12.9 |      | 8    | 31.8 |
|            |                                      |        |            |      |      |      |      |
|            |                                      | HCT116 | MDA-MB-231 | T98  | A375 | A549 | MCF7 |
| A549       |                                      |        |            |      |      |      |      |
|            | % NON-OVERLAP                        |        |            |      |      | 62.7 |      |
|            | % OVERLAP                            | 3      | 20.4       | 6.5  | 1.8  |      | 2    |
|            | % OVERLAP<br>NORMALIZED/1000<br>DEGS | 9.9    | 11.5       | 8.7  | 8    |      | 5    |
|            |                                      |        |            |      |      |      |      |
|            |                                      | HCT116 | MDA-MB-231 | T98  | A375 | A549 | MCF7 |
| MCF7       |                                      |        |            |      |      |      |      |
|            | % NON-OVERLAP                        |        |            |      |      |      | 51.3 |
|            | % OVERLAP                            | 4.3    | 16.5       | 13.3 | 7.3  | 19.8 |      |
|            | % OVERLAP<br>NORMALIZED/1000<br>DEGS | 14.2   | 9.3        | 17.8 | 31.7 | 5.04 |      |

**Figure S1.** Dpep-responsive DEGs show both unique and overlapping patterns of expression in 6 cancer cell lines. Percentages of unique (highlighted in green) and overlapping (highlighted in yellow) Dpep-regulated DEGs among 6 different cancer lines are shown. Overlap comparisons are given based on absolute number and as normalized per 1000 DEGs to take into account the differing numbers of total DEGs observed in each line. Values highlighted in yellow designate the normalized percentages for A375 and MCF7 cells which are substantially higher than those for other cell line pairs.

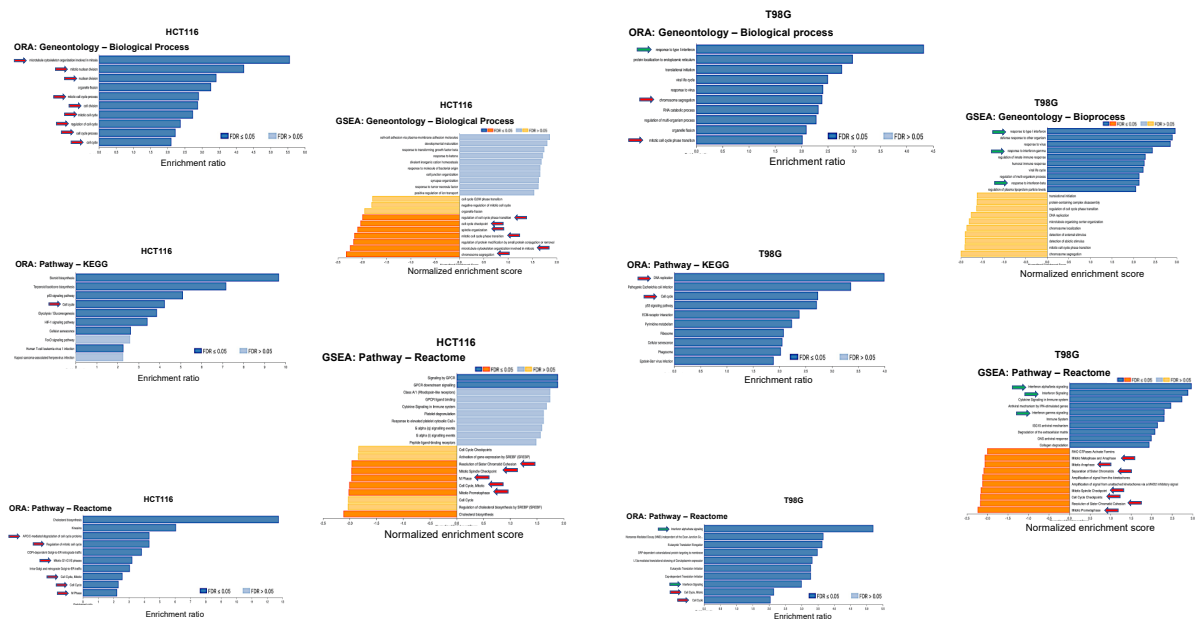

**Figure S2.** ORA and GSEA geneontology and pathway analyses of total DEGs for HCT116 and T98G cells shows significant enrichment of DEGs related to various cell cycle events. Red arrows indicate categories relevant to various phases of the cell cycle. Green arrows indicate categories relevant to response to interferons.

DEGs ASSOCIATED WITH DNA REPAIR

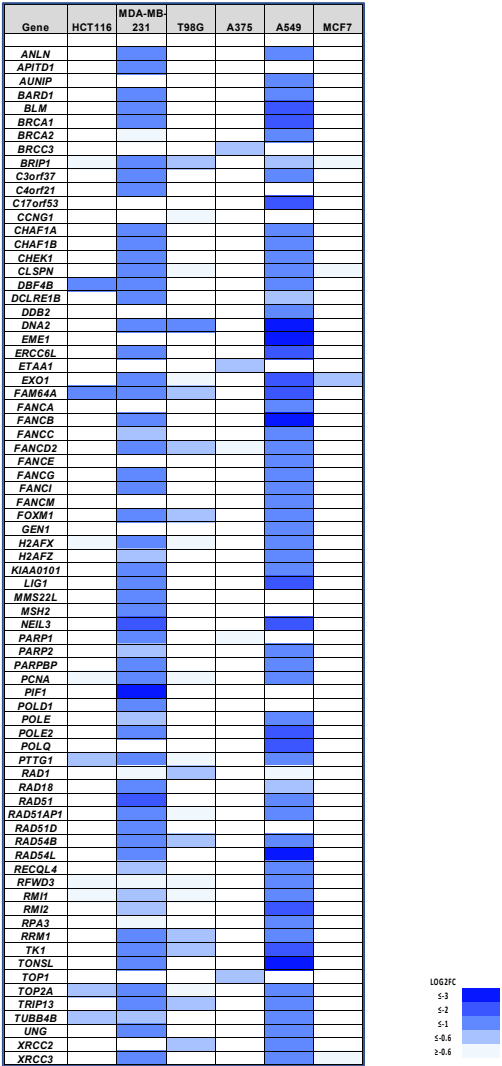

Figure S3. Dpep downregulates genes associated with DNA repair.

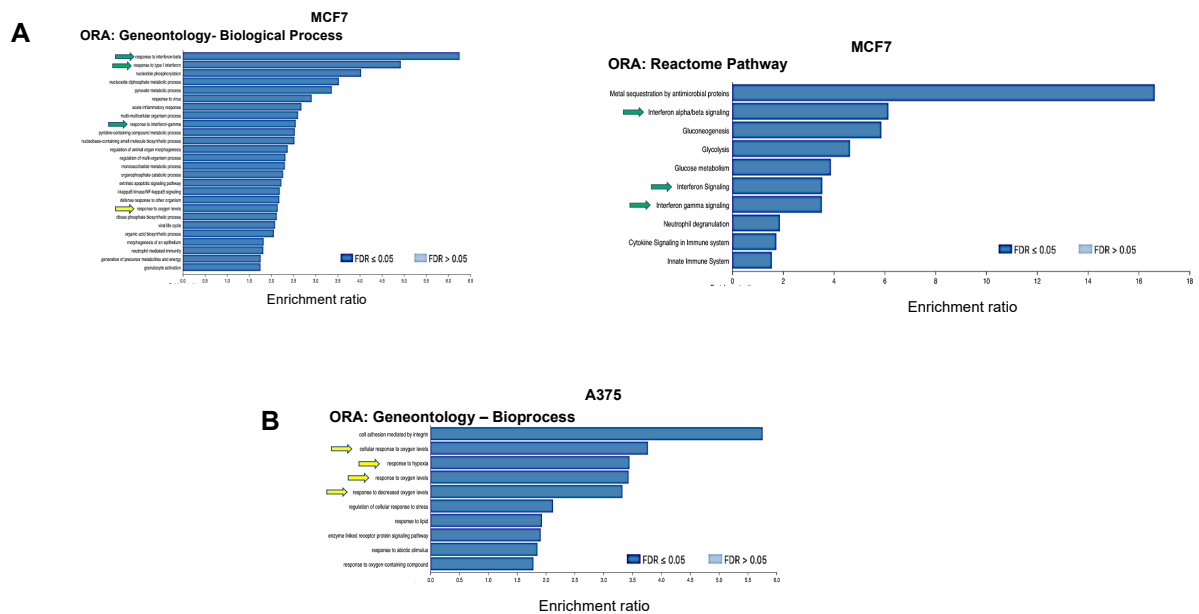

**Figure S4.** Dep regulates genes associated with interferon responses and hypoxia in a subset of cell lines. A. ORA geneontology and reactome analysis of MCF7 cell total DEGs reveals enrichment of genes associated with responses to interferons (green arrows) and hypoxia (yellow arrows). B. ORA geneontology analysis of A375 total DEGS reveals enrichment of genes associated with hypoxia (yellow arrows).

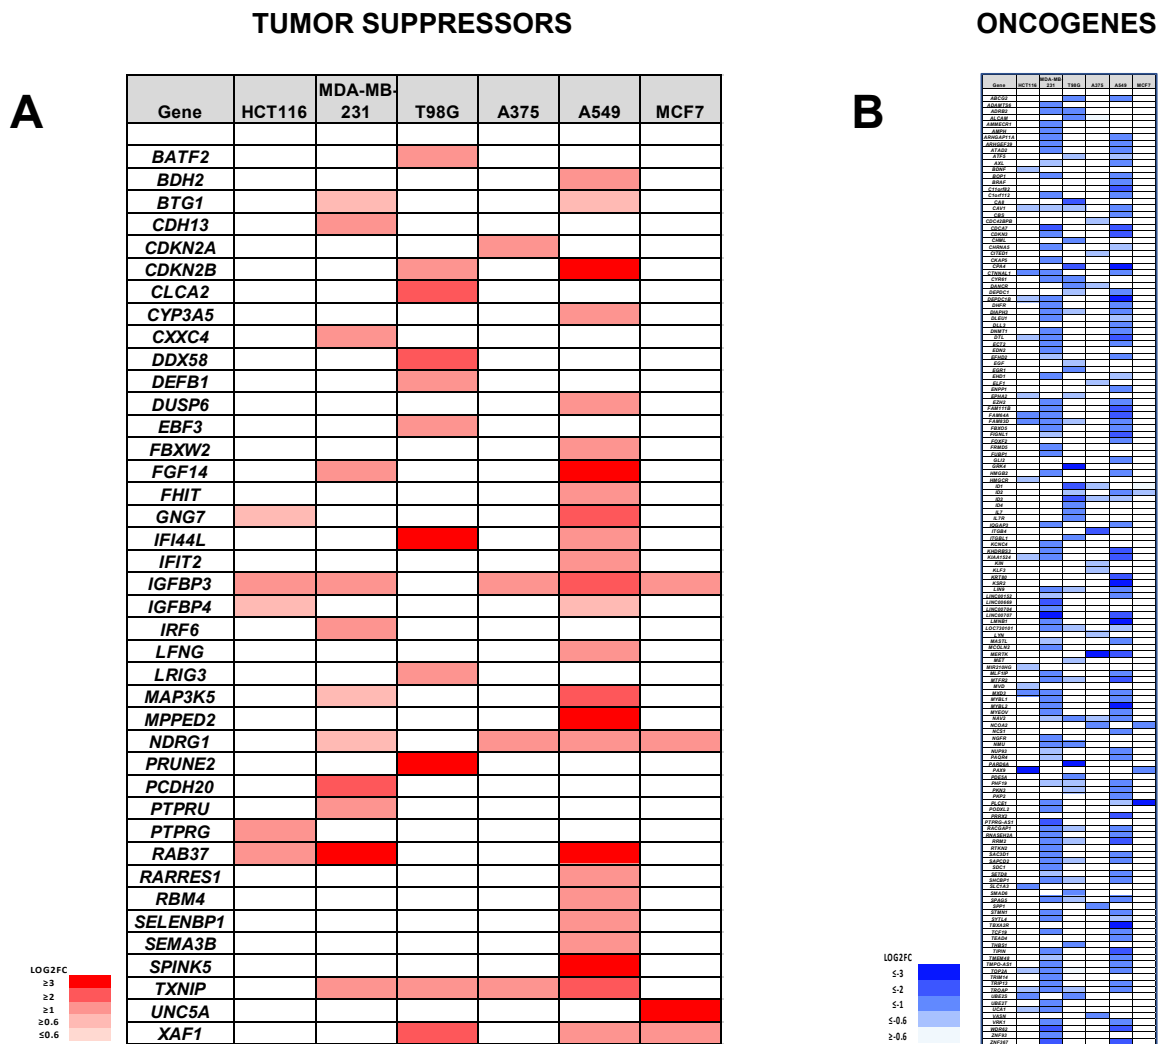

| MEAN RANK |         |       |         |  | TOP RANK |         |          |         |  |
|-----------|---------|-------|---------|--|----------|---------|----------|---------|--|
| Rank      | TF      | Score | # Lines |  | Rank     | TF      | Score    | # Lines |  |
| 1         | CEBPB   | 7.5   | 5       |  | 1        | ATF5    | 6.14E-04 | 4       |  |
| 2         | BATF2   | 15.33 | 4       |  | 2        | BATF2   | 6.14E-04 | 4       |  |
| 3         | IRF5    | 15.75 | 5       |  | 3        | IRF5    | 7.12E-04 | 3       |  |
| 4         | STAT1   | 24.85 | 5       |  | 4        | STAT1   | 0.001205 | 5       |  |
| 5         | IRF1    | 24.85 | 5       |  | 5        | ABHL1   | 0.001245 | 5       |  |
| 6         | STAT1   | 14.8  | 4       |  | 6        | IRF5A   | 0.001425 | 2       |  |
| 7         | SP119   | 41    | 2       |  | 7        | TRAF2   | 0.001543 | 3       |  |
| 8         | STAT3   | 61    | 5       |  | 8        | ASCL2   | 0.001987 | 2       |  |
| 9         | BHLHE40 | 48    | 6       |  | 9        | ZNF384A | 0.002137 | 2       |  |
| 10        | IRF5A   | 57.33 | 2       |  | 10       | IRF5    | 0.002407 | 2       |  |
| 11        | PLSCR1  | 53.5  | 6       |  | 11       | ZBED1   | 0.002469 | 3       |  |
| 12        | NR1H2   | 68.5  | 6       |  | 12       | NR3C1   | 0.003071 | 3       |  |
| 13        | STAT3   | 67.33 | 2       |  | 13       | CEBP    | 0.003111 | 5       |  |
| 14        | KLIF1   | 89.75 | 3       |  | 14       | MNT     | 0.003387 | 3       |  |
| 15        | GRB1    | 73.33 | 2       |  | 15       | ZNF703  | 0.003391 | 3       |  |
| 16        | KLIF1   | 74    | 3       |  | 16       | STAT2   | 0.003889 | 4       |  |
| 17        | CEBPB   | 72.5  | 5       |  | 17       | ZC2C2   | 0.003724 | 3       |  |
| 18        | CR1     | 104   | 2       |  | 18       | IRF3    | 0.004274 | 2       |  |
| 19        | CEBPB   | 77.87 | 2       |  | 19       | ZNF584  | 0.004274 | 2       |  |
| 20        | IRF5A   | 81.55 | 2       |  | 20       | ETV6    | 0.004308 | 3       |  |
| 21        | IRF5A   | 81.87 | 3       |  | 21       | AEBP1   | 0.004974 | 2       |  |
| 22        | FOXP1   | 98.4  | 3       |  | 22       | NR1H2   | 0.005075 | 3       |  |
| 23        | IRF5A   | 106.5 | 3       |  | 23       | FOXP1   | 0.004986 | 3       |  |
| 24        | IRF5A   | 106.5 | 3       |  | 24       | ZNF2    | 0.0056   | 3       |  |
| 25        | SOX4    | 104   | 2       |  | 25       | SOX4    | 0.004993 | 3       |  |
| 26        | IRF5A   | 107   | 2       |  | 26       | CEBPB   | 0.00523  | 3       |  |
| 27        | ATF6B   | 107   | 2       |  | 27       | IRF1    | 0.005724 | 4       |  |
| 28        | CEBPB   | 107.3 | 3       |  | 28       | BHLHE40 | 0.005725 | 3       |  |
| 29        | IRF7    | 107.7 | 4       |  | 29       | PRDM2   | 0.005845 | 3       |  |
| 30        | IRF5A   | 108   | 3       |  | 30       | IRF5A   | 0.005923 | 3       |  |
| 31        | IRF2B   | 108.5 | 3       |  | 31       | PRKX2   | 0.007171 | 3       |  |
| 32        | ZNF356  | 116.7 | 3       |  | 32       | TNRC2   | 0.007467 | 3       |  |
| 33        | ZNF356  | 116.5 | 3       |  | 33       | SOX9    | 0.007535 | 3       |  |
| 34        | SOX4    | 116.6 | 3       |  | 34       | GLI3    | 0.007785 | 3       |  |
| 35        | SOX4    | 117   | 3       |  | 35       | SNAP1   | 0.00785  | 3       |  |
| 36        | ZBED1   | 126.3 | 3       |  | 36       | JUN     | 0.008478 | 4       |  |
| 37        | IRF5    | 126.5 | 3       |  | 37       | IRF5    | 0.008478 | 4       |  |
| 38        | ZNF282  | 122   | 3       |  | 38       | NR1H2   | 0.008772 | 3       |  |
| 39        | IRF5A   | 124.5 | 5       |  | 39       | NR1H2   | 0.008772 | 3       |  |
| 40        | IRF5    | 124.5 | 5       |  | 40       | STAT3   | 0.009334 | 3       |  |
| 41        | IRF5    | 127.5 | 3       |  | 41       | ASCL2   | 0.009353 | 3       |  |
| 42        | ZNF356  | 130.5 | 2       |  | 42       | IRF5A   | 0.009356 | 5       |  |
| 43        | STAT3   | 132.5 | 3       |  | 43       | CEBPB   | 0.009372 | 5       |  |
| 44        | IRF5    | 134.5 | 3       |  | 44       | IRF5A   | 0.009372 | 5       |  |
| 45        | HNF1B   | 135.5 | 3       |  | 45       | ZNF14   | 0.01059  | 3       |  |
| 46        | IRF5    | 136.5 | 3       |  | 46       | IRF5    | 0.01059  | 3       |  |
| 47        | IRF5    | 142.5 | 5       |  | 47       | NR1H2   | 0.01108  | 4       |  |
| 48        | IRF5    | 145.5 | 2       |  | 48       | KLIF1   | 0.01119  | 4       |  |
| 49        | IRF5    | 145.5 | 2       |  | 49       | KLIF1   | 0.01119  | 4       |  |
| 50        | BATF1   | 149   | 3       |  | 50       | IRF5    | 0.01211  | 3       |  |
| 51        | CEBPB   | 150.5 | 3       |  | 51       | ATF5    | 0.01211  | 3       |  |
| 52        | CEBPB   | 150.5 | 3       |  | 52       | CEBPB   | 0.01211  | 3       |  |
| 53        | CEBPB   | 150.5 | 3       |  | 53       | CEBPB   | 0.01211  | 3       |  |
| 54        | CEBPB   | 150.5 | 3       |  | 54       | CEBPB   | 0.01211  | 3       |  |
| 55        | CEBPB   | 150.5 | 3       |  | 55       | CEBPB   | 0.01211  | 3       |  |
| 56        | CEBPB   | 150.5 | 3       |  | 56       | CEBPB   | 0.01211  | 3       |  |
| 57        | CEBPB   | 150.5 | 3       |  | 57       | CEBPB   | 0.01211  | 3       |  |
| 58        | CEBPB   | 150.5 | 3       |  | 58       | CEBPB   | 0.01211  | 3       |  |
| 59        | CEBPB   | 150.5 | 3       |  | 59       | CEBPB   | 0.01211  | 3       |  |
| 60        | CEBPB   | 150.5 | 3       |  | 60       | CEBPB   | 0.01211  | 3       |  |
| 61        | CEBPB   | 150.5 | 3       |  | 61       | CEBPB   | 0.01211  | 3       |  |
| 62        | CEBPB   | 150.5 | 3       |  | 62       | CEBPB   | 0.01211  | 3       |  |
| 63        | CEBPB   | 150.5 | 3       |  | 63       | CEBPB   | 0.01211  | 3       |  |
| 64        | CEBPB   | 150.5 | 3       |  | 64       | CEBPB   | 0.01211  | 3       |  |
| 65        | CEBPB   | 150.5 | 3       |  | 65       | CEBPB   | 0.01211  | 3       |  |
| 66        | CEBPB   | 150.5 | 3       |  | 66       | CEBPB   | 0.01211  | 3       |  |
| 67        | CEBPB   | 150.5 | 3       |  | 67       | CEBPB   | 0.01211  | 3       |  |
| 68        | CEBPB   | 150.5 | 3       |  | 68       | CEBPB   | 0.01211  | 3       |  |
| 69        | CEBPB   | 150.5 | 3       |  | 69       | CEBPB   | 0.01211  | 3       |  |
| 70        | CEBPB   | 150.5 | 3       |  | 70       | CEBPB   | 0.01211  | 3       |  |
| 71        | CEBPB   | 150.5 | 3       |  | 71       | CEBPB   | 0.01211  | 3       |  |
| 72        | CEBPB   | 150.5 | 3       |  | 72       | CEBPB   | 0.01211  | 3       |  |
| 73        | CEBPB   | 150.5 | 3       |  | 73       | CEBPB   | 0.01211  | 3       |  |
| 74        | CEBPB   | 150.5 | 3       |  | 74       | CEBPB   | 0.01211  | 3       |  |
| 75        | CEBPB   | 150.5 | 3       |  | 75       | CEBPB   | 0.01211  | 3       |  |
| 76        | CEBPB   | 150.5 | 3       |  | 76       | CEBPB   | 0.01211  | 3       |  |
| 77        | CEBPB   | 150.5 | 3       |  | 77       | CEBPB   | 0.01211  | 3       |  |
| 78        | CEBPB   | 150.5 | 3       |  | 78       | CEBPB   | 0.01211  | 3       |  |
| 79        | CEBPB   | 150.5 | 3       |  | 79       | CEBPB   | 0.01211  | 3       |  |
| 80        | CEBPB   | 150.5 | 3       |  | 80       | CEBPB   | 0.01211  | 3       |  |
| 81        | CEBPB   | 150.5 | 3       |  | 81       | CEBPB   | 0.01211  | 3       |  |
| 82        | CEBPB   | 150.5 | 3       |  | 82       | CEBPB   | 0.01211  | 3       |  |
| 83        | CEBPB   | 150.5 | 3       |  | 83       | CEBPB   | 0.01211  | 3       |  |
| 84        | CEBPB   | 150.5 | 3       |  | 84       | CEBPB   | 0.01211  | 3       |  |
| 85        | CEBPB   | 150.5 | 3       |  | 85       | CEBPB   | 0.01211  | 3       |  |
| 86        | CEBPB   | 150.5 | 3       |  | 86       | CEBPB   | 0.01211  | 3       |  |
| 87        | CEBPB   | 150.5 | 3       |  | 87       | CEBPB   | 0.01211  | 3       |  |
| 88        | CEBPB   | 150.5 | 3       |  | 88       | CEBPB   | 0.01211  | 3       |  |
| 89        | CEBPB   | 150.5 | 3       |  | 89       | CEBPB   | 0.01211  | 3       |  |
| 90        | CEBPB   | 150.5 | 3       |  | 90       | CEBPB   | 0.01211  | 3       |  |
| 91        | CEBPB   | 150.5 | 3       |  | 91       | CEBPB   | 0.01211  | 3       |  |
| 92        | CEBPB   | 150.5 | 3       |  | 92       | CEBPB   | 0.01211  | 3       |  |
| 93        | CEBPB   | 150.5 | 3       |  | 93       | CEBPB   | 0.01211  | 3       |  |
| 94        | CEBPB   | 150.5 | 3       |  | 94       | CEBPB   | 0.01211  | 3       |  |
| 95        | CEBPB   | 150.5 | 3       |  | 95       | CEBPB   | 0.01211  | 3       |  |
| 96        | CEBPB   | 150.5 | 3       |  | 96       | CEBPB   | 0.01211  | 3       |  |
| 97        | CEBPB   | 150.5 | 3       |  | 97       | CEBPB   | 0.01211  | 3       |  |
| 98        | CEBPB   | 150.5 | 3       |  | 98       | CEBPB   | 0.01211  | 3       |  |
| 99        | CEBPB   | 150.5 | 3       |  | 99       | CEBPB   | 0.01211  | 3       |  |
| 100       | CEBPB   | 150.5 | 3       |  | 100      | CEBPB   | 0.01211  | 3       |  |

| MEAN RANK |         |        |        | TOP RANK |         |          |        |
|-----------|---------|--------|--------|----------|---------|----------|--------|
| Rank      | TF      | Score  | #Lines | Rank     | TF      | Score    | #Lines |
| 1         | ATF5    | 5.5    | 2      | 1        | ATF5    | 6.14E-04 | 4      |
| 2         | ZNF173  | 15.33  | 4      | 2        | ZNF356  | 0.001205 | 3      |
| 3         | MYC1A1  | 17.33  | 2      | 3        | ZNF356  | 7.12E-04 | 4      |
| 4         | CEBPB   | 22.87  | 5      | 4        | STAT1   | 0.001205 | 5      |
| 5         | FOXP2   | 22.87  | 5      | 5        | PRDM18  | 0.001245 | 5      |
| 6         | STAT1   | 24.85  | 5      | 6        | IRF5    | 0.001425 | 2      |
| 7         | GLIS2   | 24.87  | 4      | 7        | MYC1    | 0.001563 | 4      |
| 8         | CEBPB   | 25.33  | 3      | 8        | ZNF43   | 0.001587 | 2      |
| 9         | STAT1   | 27.8   | 2      | 9        | ANAPC1  | 0.001537 | 3      |
| 10        | FOXP2   | 31     | 1      | 10       | BHLHE40 | 0.002407 | 2      |
| 11        | CEBPB   | 31     | 2      | 11       | STAT1   | 0.002469 | 3      |
| 12        | HP1A    | 38.8   | 3      | 12       | ZEB1    | 0.003071 | 2      |
| 13        | CEBPB   | 40.33  | 3      | 13       | CEBPB   | 0.003111 | 5      |
| 14        | CEBPB   | 40.33  | 2      | 14       | ZBTB7A  | 0.003387 | 3      |
| 15        | ZNF356  | 45     | 4      | 15       | MAF     | 0.003391 | 2      |
| 16        | CEBPB   | 45     | 4      | 16       | CEBPB   | 0.003889 | 4      |
| 17        | MYC1    | 50.87  | 4      | 17       | NFKB1   | 0.004274 | 3      |
| 18        | CEBPB   | 51.33  | 3      | 18       | CEBPB   | 0.004274 | 3      |
| 19        | STAT1   | 52.25  | 2      | 19       | FOXP2   | 0.004308 | 3      |
| 20        | PRDM1   | 55.87  | 2      | 20       | CEBPB   | 0.004974 | 2      |
| 21        | CEBPB   | 55.33  | 3      | 21       | STAT1   | 0.005075 | 3      |
| 22        | ATF1    | 68.33  | 3      | 22       | TEAD3   | 0.005923 | 3      |
| 23        | CEBPB   | 72.87  | 4      | 23       | ZNF683  | 0.005923 | 3      |
| 24        | STAT1   | 88     | 3      | 24       | TPST1   | 0.00696  | 3      |
| 25        | CEBPB   | 88.33  | 2      | 25       | CEBPB   | 0.006969 | 3      |
| 26        | BHLHE40 | 119.8  | 8      | 26       | HP1A    | 0.008009 | 3      |
| 27        | MYC1    | 91     | 2      | 27       | DIRT3   | 0.008143 | 3      |
| 28        | STAT1   | 88.33  | 3      | 28       | FOXP2   | 0.008923 | 2      |
| 29        | STAT1   | 88.33  | 3      | 29       | GLIS2   | 0.009161 | 8      |
| 30        | CEBPB   | 88.67  | 6      | 30       | STAT1   | 0.009254 | 3      |
| 31        | MEIS3   | 88     | 3      | 31       | ZNF385  | 0.009712 | 3      |
| 32        | CEBPB   | 88.33  | 3      | 32       | FOXP2   | 0.009712 | 3      |
| 33        | STAT1   | 88.8   | 3      | 33       | MYC1    | 0.009767 | 3      |
| 34        | MECP1   | 97.3   | 3      | 34       | STAT1   | 0.009793 | 3      |
| 35        | CEBPB   | 97.33  | 3      | 35       | TALE1   | 0.009793 | 3      |
| 36        | CEBPB   | 109.3  | 3      | 36       | NC1     | 0.00989  | 3      |
| 37        | STAT1   | 111.7  | 3      | 37       | STAT1   | 0.009875 | 3      |
| 38        | MYC1    | 110    | 3      | 38       | EGFR    | 0.009847 | 2      |
| 39        | CEBPB   | 110    | 2      | 39       | NC1     | 0.0098   | 3      |
| 40        | MYC1    | 110    | 3      | 40       | ZNF385  | 0.009834 | 3      |
| 41        | PLCB1   | 115.8  | 6      | 41       | CEBPB   | 0.009923 | 2      |
| 42        | STAT1   | 115.8  | 3      | 42       | STAT1   | 0.009856 | 3      |
| 43        | PRDM18  | 119.2  | 3      | 43       | MAZ     | 0.0091   | 2      |
| 44        | CEBPB   | 119.33 | 3      | 44       | FOXP2   | 0.009866 | 3      |
| 45        | CEBPB   | 119.33 | 3      | 45       | CEBPB   | 0.009866 | 3      |
| 46        | NFIB2   | 119.4  | 4      | 46       | JUN     | 0.0108   | 4      |
| 47        | CEBPB   | 121.2  | 3      | 47       | CEBPB   | 0.0108   | 3      |
| 48        | CEBPB   | 121.67 | 3      | 48       | FOXP2   | 0.0114   | 3      |
| 49        | ZNF897  | 126.3  | 3      | 49       | BNCT1   | 0.00787  | 2      |
| 50        | STAT1   | 127    | 3      | 50       | STAT1   | 0.01193  | 3      |
| 51        | MYC1    | 129    | 2      | 51       | STAT1   | 0.009211 | 2      |
|           |         |        |        |          |         |          |        |
| 253       | ATF1    | 155    | 3      | 66       | ATF1    | 0.0155   | 3      |
| 254       | CEBPB   | 160    | 3      | 66       | CEBPB   | 0.0155   | 3      |
| 71        | CEBPB   | 160    | 3      | 66       | CEBPB   | 0.0155   | 3      |
